# Supplementary material for: Following Polymer Degradation with Nanodiamond Magnetometry
Source: PubMed Central journal article supplement — ACS Sens. 2022 Jan 4;7(1):123–30. doi: 10.1021/acssensors.1c01782 (PMC8809337; doi:10.1021/acssensors.1c01782), 2022-01-04
Supplement: se1c01782_si_001.pdf [file se1c01782_si_001.pdf]

## Supplementary information

Following polymer degradation with nanodiamond magnetometry.

Runrun Li<sup>#</sup>, Thea Vedelaar<sup>#</sup>, Aldona Mzyk<sup>1,2</sup>, Aryan Morita<sup>1,3</sup>, Sandeep Kumar Padamati<sup>1</sup>, Romana Schirhagl<sup>1\*</sup>

<sup>1</sup> Groningen University, University Medical Center Groningen, Antonius Deusinglaan 1, 9713 AW Groningen, the Netherlands

<sup>2</sup> Institute of Metallurgy and Materials Science, Polish Academy of Sciences, Reymonta 25, 30-059 Krakow, Poland

<sup>3</sup> Dept. Dental Biomedical Sciences, Faculty of Dentistry, Universitas Gadjah Mada, Jalan Denta 1, Sekip Utara Yog-yakarta 55281, Indonesia

Correspondence to: romana.schirhagl@gmail.com

# These two authors contributed equally

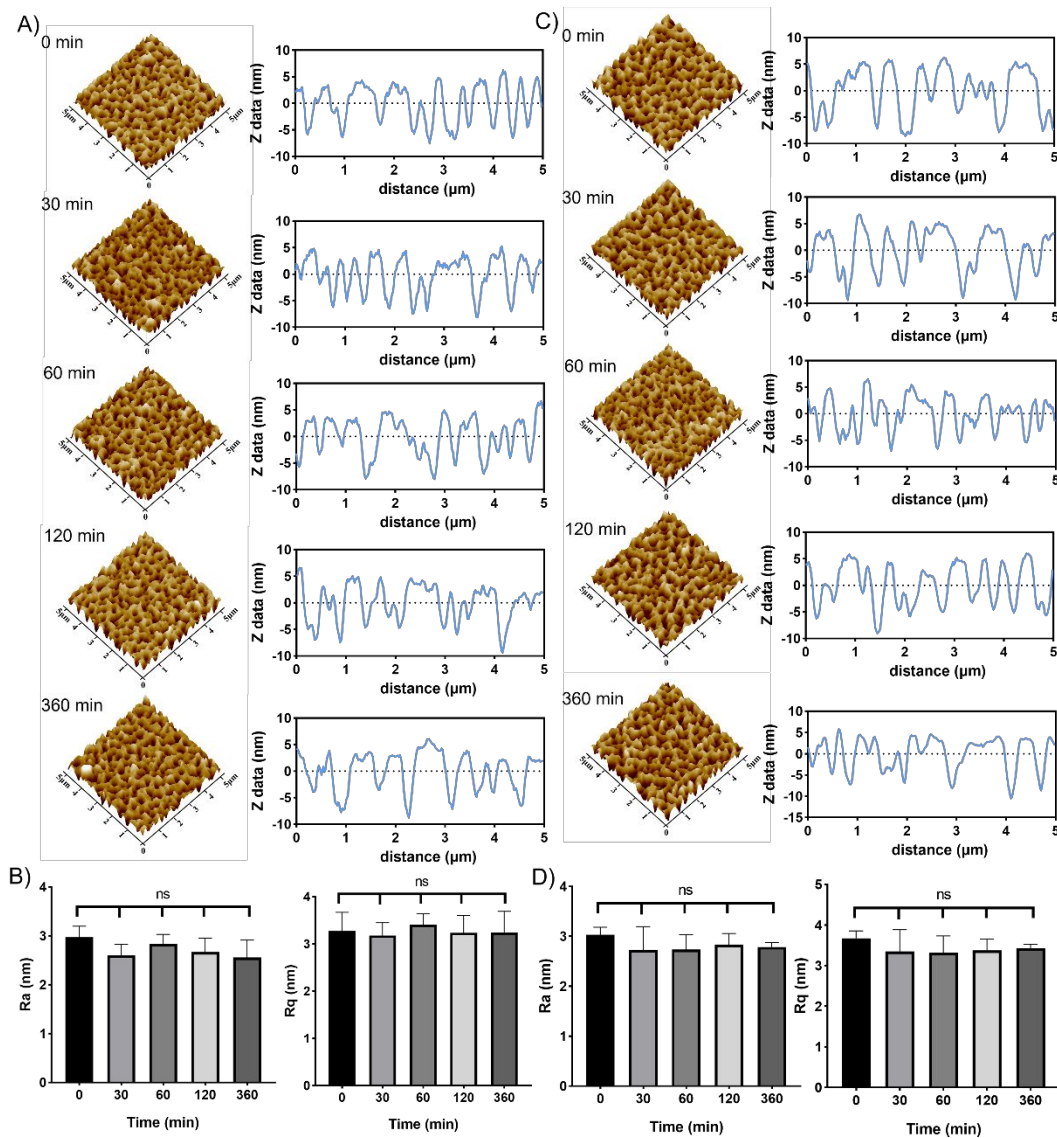

**Figure S1.** Contacting mode 3D AFM images of PLA film surfaces, z-profiles cross the surface were shown after PLA film was treated with pH 7 and pH 10 solution for 0 min, 30 min, 60 min, 120 min and 360 min. Corresponding surface roughness parameters, including arithmetic mean roughness  $R_a$  and

RMS roughness  $R_q$  were calculated from the AFM images as well. (A) the PLA film before pH 7 solution degradation and the PLA film treated with pH 7 solution. (B)  $R_a$  and  $R_q$  of AFM images before and after pH 7 treatment. (C) the PLA film before pH 10 solution degradation and the PLA film treated with pH 10 solution. (D)  $R_a$  and  $R_q$  of AFM images before and after pH 10 treatment.

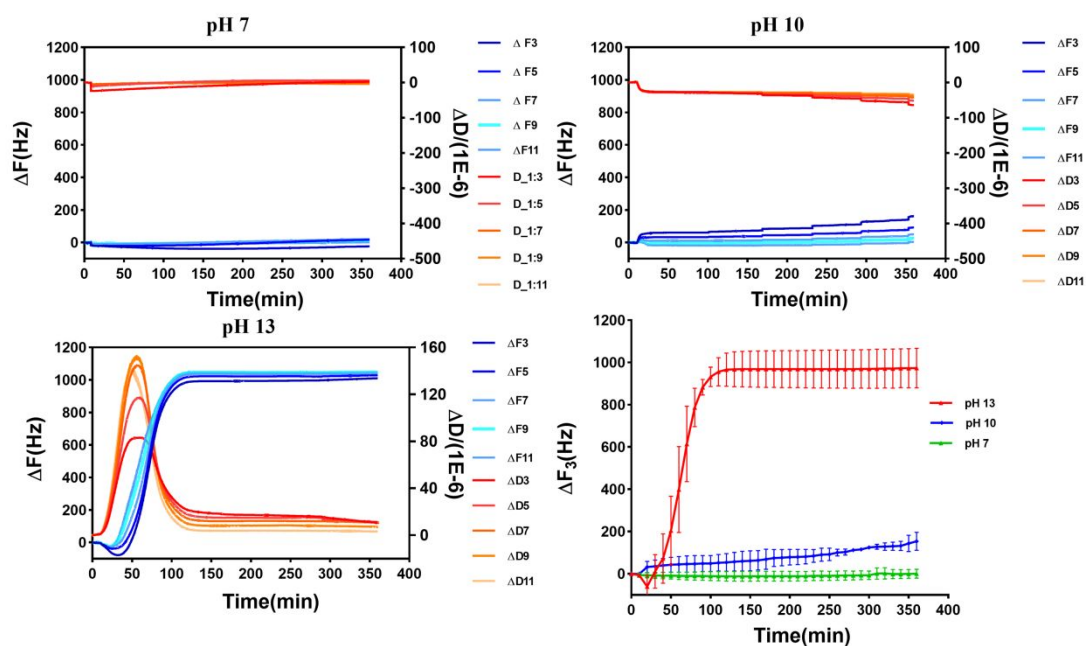

**Figure S2.** QCM-D monitoring of resonance frequency ( $\Delta F$ , blue) and dissipation ( $\Delta D$ , orange) at several overtones ( $n=3, 5, 7, 9$  and  $11$ ) were obtained over time during pH 7 (a), pH 10 (b) and pH 13 (c) solutions at 25 °C.  $\Delta F_3$  as a normalized frequency were compared in different experimental sets (d).

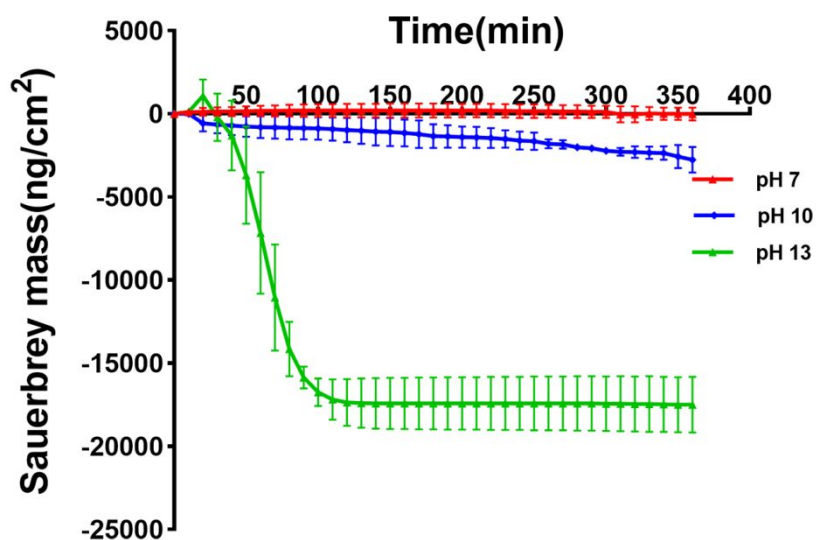

**Figure S3.** The mass versus time plot at pH 7, pH 10 and pH 13 solution at 25 °C, respectively. The mass data were obtained using the Sauerbrey equation (1) from  $\Delta F$  data.

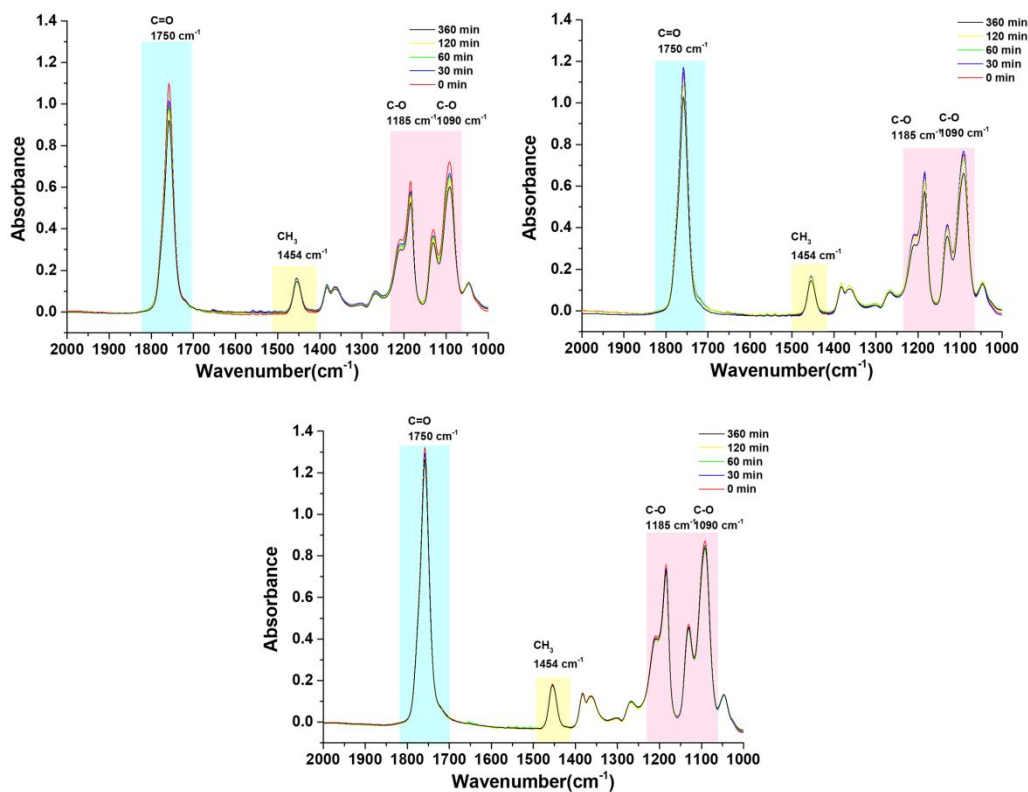

**Figure S4.** FTIR spectra during degradation was obtained from PLA thin films exposed to pH 13 (a), pH 10 (b) and pH 7 (c). The red line represents before degradation, the blue line, green line, yellow line, and black line represent 30, 60, 120, and 360 minutes after degradation, respectively.

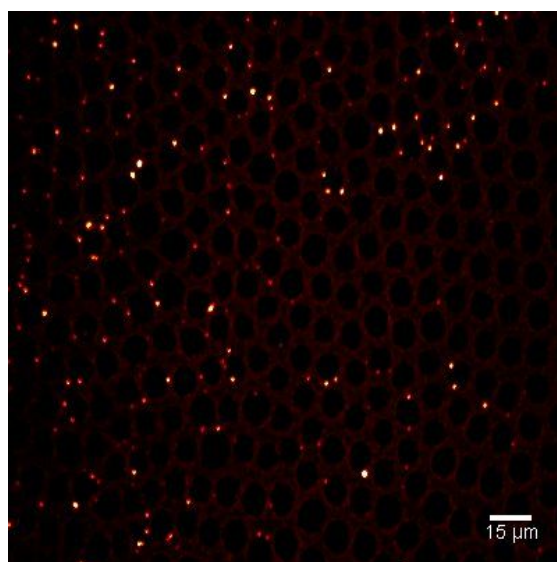

**Figure S5.** The PLA thin film mixed with 0.1wt% FNDs, red-white dots are FNDs, evenly distributed in the film.

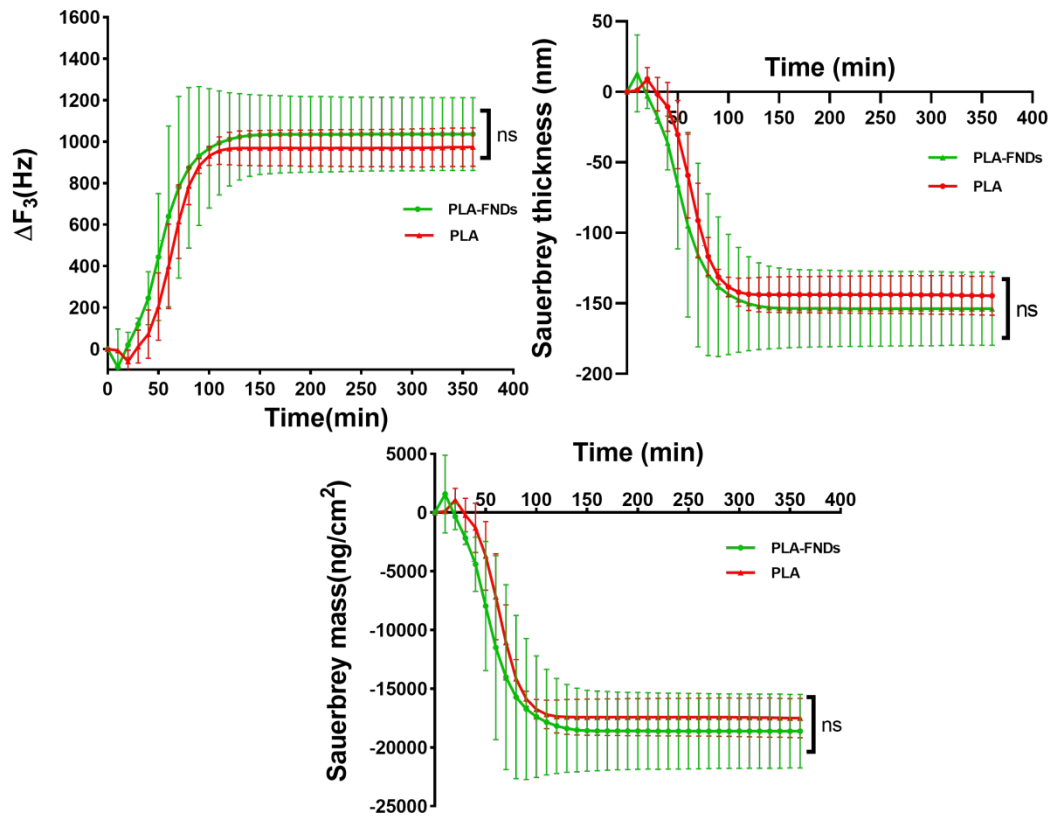

**Figure S6.** Comparison of degradation of PLA film and PLA with FNDs film after treatment of pH 13 solution, including changes in  $\Delta F$ , Sauerbrey mass and Sauerbrey thickness. (Statistics were evaluated using Graphpad Prism 8.0.1 by multiple t tests, and  $p \leq$  values 0.05 were considered as significant differences.)

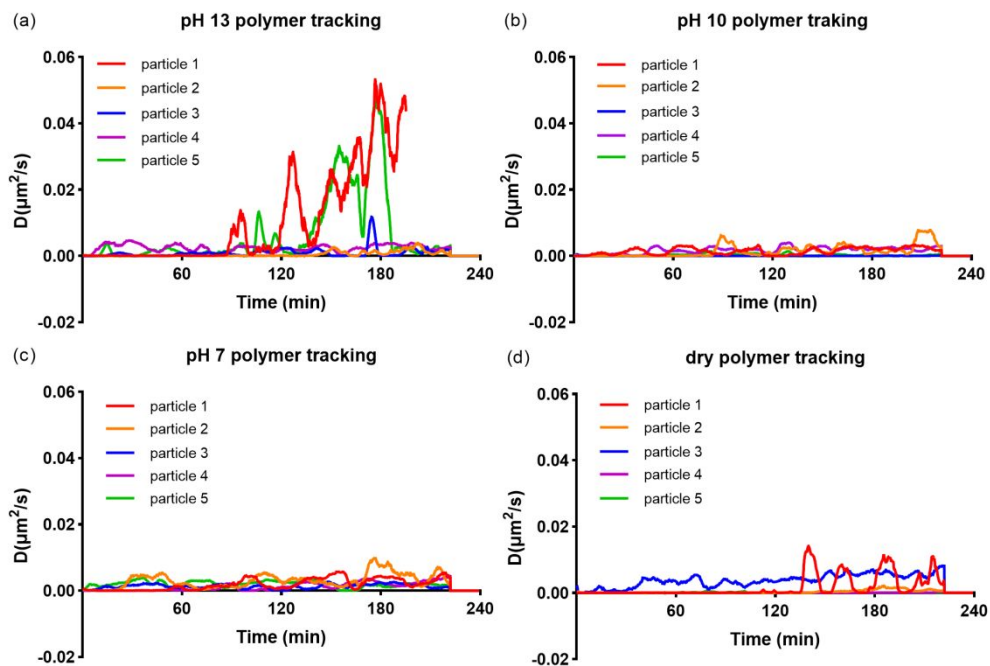

**Figure S7.** The diffusion coefficients of five FNDs tracking in each polymer film under pH 13 (a), pH 10 (b) and pH 7 (c), and dry film (d).

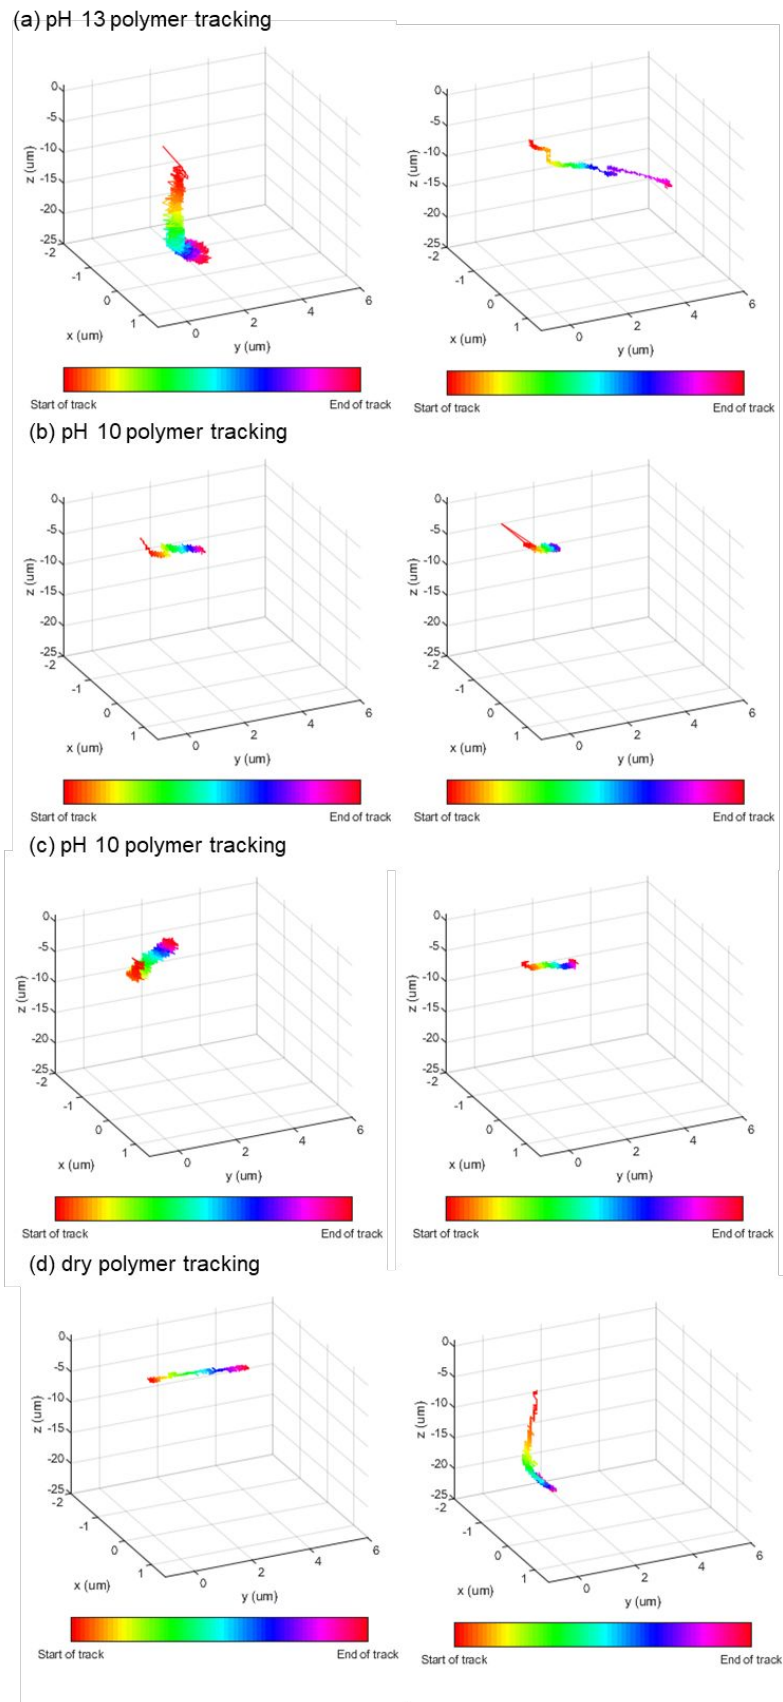

**Figure S8.** 3D trajectories for particle tracking, two typical FNDs trajectories of the polymer film were shown under pH 13 (a), pH 10 (b) and pH 7 (c), and dry film (d).

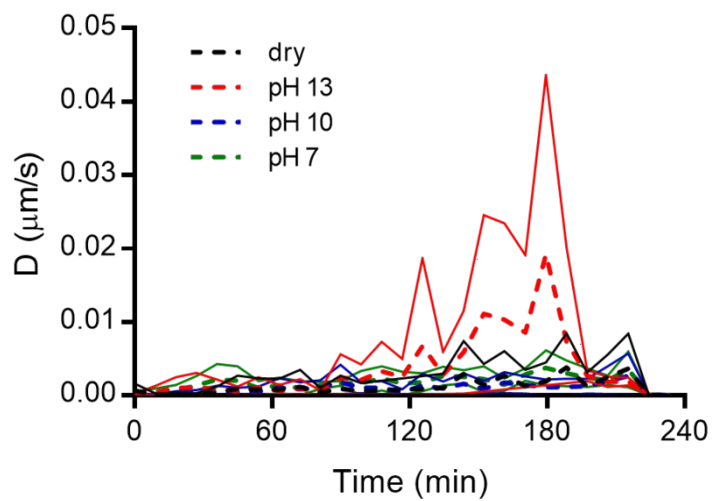

**Figure S9.** FNDs tracking results with error boundaries. The dotted lines represent the average of the tracks with the solid lines as the error boundaries based on the standard deviation.
